# Supplementary material for: Insight into carbon nanotube effect on polymer molecular orientation: an infrared dichroism study
Source: Royal Society of Chemistry journal article supplement (doi:10.1039/c0cc03198d), 2010-11-15
Supplement: c0cc03198d.pdf [file c0cc03198d.pdf]

## Insight into carbon nanotube effect on polymer molecular orientation: an infrared dichroism study

Cuiping Yuan,<sup>a,b</sup> Jinhao Zhang,<sup>a,b</sup> Guangming Chen\*<sup>a</sup> and Jiping Yang\*<sup>b</sup>

<sup>a</sup> *Beijing National Laboratory for Molecular Sciences (BNLMS), Institute of Chemistry, Chinese Academy of Sciences, Beijing 100190, P. R. China. E-mail: chengm@iccas.ac.cn.*

<sup>b</sup> *School of Materials Science and Engineering, Beihang University, Beijing 100191, P. R. China. E-mail: jyang@buaa.edu.cn.*

### Materials and preparations.

The MWCNTs used here are commercial Baytubes C150 P from Bayer, MaterialScience AG, produced in a high-yield catalytic process based on chemical vapor deposition (CVD). The sPS, XAREC SP130, was kindly provided by Japan Idemitsu Kosan Co. Ltd. Its syndiotacticity, [rr], is larger than 97%.

The preparation of the sPS/MWCNT composite was described in the reference of G. Sun, G. Chen, Z. Liu and M. Chen, *Carbon*, 2010, **48**, 1434.

The sPS/MWCNT nanocomposite or pure sPS films with thickness around 100 μm were prepared by pressing the dried samples between two laminators with 15 MPa at 300 °C for 10min. Then, they were quickly immersed into ice/water mixture to obtain amorphous films.

### Stretching procedure.

The film samples of the sPS or sPS/MWCNT nanocomposite were first fixed using a self-made stretching instrument by the two ends. Then, it was put into a thermostat. When the temperature reached 140 °C and became stable, the film was stretched to a certain length. After the stretching, it was cooled at room temperature.

### Measurements.

The infrared dichroism measurements were carried out on a Perkin-Elmer System 2000 (Perkin-Elmer Corporation) Fourier transform infrared (FTIR) spectrophotometer with a Perkin-Elmer wire grid polarizer to record the polarized FTIR spectra. For all transmission FTIR spectra, the film planes of the samples were installed perpendicular to the incident beam direction. The FTIR spectra were recorded at 2 cm<sup>-1</sup> nominal resolution with an accumulation of 126 scans. Polarization of the beam was conducted by rotating the polarizer.

### Calculations.

The dichroic ratios ( $R$ ) were measured by  $R = A_{//} / A_{\perp}$ , wherein  $A_{//}$  and  $A_{\perp}$  represent the absorbance of a band with incident light parallel and perpendicular to the stretching direction, respectively.

The draw ratios were calculated by draw ratio =  $L / L_0$ , wherein  $L$  and  $L_0$  stand for the lengths between the inner two fixed ends after and before stretching, respectively.

**Table 1** Infrared band assignments of MWCNTs, sPS, and sPS/MWCNT nanocomposite.

| Band / $\text{cm}^{-1}$ | Assignment                                      |
|-------------------------|-------------------------------------------------|
| 3437                    | Hydrogen-bonded O–H stretching of MWCNTs        |
| 3082                    | $\nu_{20\text{B}}(\text{B}_1)$                  |
| 3061                    | $\nu'_{20\text{A}}(\text{A}_1)$                 |
| 3026                    | $\nu'_2(\text{A}_1)$                            |
| 2922                    | –CH <sub>2</sub> asymmetric stretching          |
| 2848                    | –CH <sub>2</sub> symmetric stretching           |
| 1637                    | –C=O stretching of MWCNT carboxylic acid groups |
| 1601                    | $\nu_9(\text{B}_1)$                             |
| 1583                    | $\nu_{9\text{A}}(\text{A}_1)$                   |
| 1493                    | $\nu_{19\text{A}}(\text{A}_1)$                  |
| 1453                    | $\nu_{19}(\text{B}_1)$                          |
| 1029                    | $\nu_{18\text{A}}(\text{A}_1)$                  |
| 903                     | $\nu_{17\text{B}}(\text{B}_2)$                  |
| 755                     | $\nu_{10\text{B}}(\text{B}_2)$                  |
| 699                     | $\nu_{11}(\text{B}_2)$                          |
| 539                     | $\nu_{6\text{A}}(\text{A}_1)$                   |
